# Supplementary material
Source: PubMed Central journal article supplement (PMC3033266)
Supplement: 1019273108_pnas.201019273SI.pdf [file 1019273108_pnas.201019273SI.pdf]

# Supporting Information

Hsieh et al. 10.1073/pnas.1019273108

## SI Methods

**Plant Material.** Seeds were plated on 0.5× Murashige and Skoog salts (Caisson Laboratories), Gamborg's Vitamins (Sigma), and 2% sucrose, stratified at 4 °C for 2 d, grown in continuous light in a growth chamber for 10 d, and then transplanted to soil and grown in greenhouse conditions (16 h light). *met1-6* (Col-*gl* ecotype) (1) homozygous plants were obtained from a self-pollinated *met1-6* heterozygote that had never been homozygous for *met1-6*. *fie-1* (2) and *dme-2* (3) heterozygous plants are in *Ler* and Col-*gl* backgrounds, respectively.

**RNA Isolation from Dissected Seed and Endosperm.** Stage 12–13 flower buds were emasculated and pollinated 48 h later. Embryo and endosperm were dissected in 0.3 M sorbitol and 5 mM Mes (pH 5.7) on a slide under a dissecting microscope 7–8 d after pollination, which corresponded to the late torpedo to early bent cotyledon stages of embryogenesis. At this stage of development, bilaterally active genes are expressed from both maternal and paternal genomes in embryo and endosperm (4). Embryos were washed to remove contaminating endosperm. Because the *Arabidopsis thaliana* seed coat has considerable tensile strength, it was possible to separate endosperm from the seed coats and extract RNA from endosperm (5). Approximately 7–10 siliques were dissected, and total RNA was extracted using RNAeasy kit (Qiagen) plus in-column DNase digestion. For WT endosperm, two independent sets of total RNA were obtained from each direction of the crosses. For one set, designated as pure endosperm in [Dataset S2](#), RNA was extracted from dissected endosperm devoid of chalazal endosperm to minimize potential seed coat contamination, whereas for the other set, designated as full endosperm, RNA was extracted from all compartments of endosperm.

**Laser Capture Microscopy.** Laser capture microdissection was done essentially as described (GEO accession no. GSM311287). Briefly, siliques containing embryos at the linear to bent cotyledon stages (6) were fixed according to the methods of Kerk et al. (7). The embryo proper or the entire endosperm, including microphyllar, peripheral, and chalazal domains, was dissected and captured from seed sections using a LMD 6000 system (Leica Microsystems), and RNA was isolated using the RNeasy microkit (Ambion).

**Library Construction.** Approximately 30–50 ng total RNA from manually dissected embryo or endosperm or 5–10 ng total RNA from laser capture microdissection (LCM) embryo or endosperm were converted to double-stranded cDNAs using the Ovation RNA-seq System (NuGen Technologies) according to the manufacturer's protocol. This system uses the Ribo-SPIA linear amplification process to amplify cDNA directly from total RNA without the need for poly-A RNA selection or ribosomal RNA depletion. About 400–600 ng Ovation-amplified cDNA was used to construct Illumina sequencing libraries following the standard Illumina genomic DNA library protocol. Illumina sequencing was performed at the Vincent J. Coates Genomic Sequencing Laboratory at University of California at Berkeley and the University of California Los Angeles Microarray Core.

**Identification of SNPs Between Col and Ler.** To identify SNPs between Columbia (Col), the reference sequenced accession of *A. thaliana*, and Landsberg *erecta* (*Ler*), we sequenced *Ler* genomic libraries using the Illumina GA2 platform and mapped these sequences onto the TAIR8 Col scaffold. SNPs were identified with the MAQ aligner (8), yielding a *Ler* pseudoscaffold with 402,226 SNPs compared with the Col reference ([Dataset S1](#)) at an average 8.7-fold coverage per SNP; a minimum consensus quality of 30 and a minimum twofold coverage per SNP was required. Over 200 SNPs were verified by conventional DNA (Sanger method) sequencing ([Dataset S3](#)). We also identified 35 SNPs in the chloroplast genome using the same criteria.

**Identification of Imprinted Genes.** Illumina (76-bp) reads from cDNA libraries were aligned to Col and *Ler* cDNA scaffolds (TAIR8) using Bowtie (9), accepting up to three mismatches in an alignment. Reads that aligned to either Col or *Ler* with fewer mismatches were assigned to that ecotype. Each cDNA model (gene) received Col and *Ler* scores, each equal to the number of reads aligned to that gene that was assigned to the respective ecotype. Each gene also received a transcriptional score, equal to the number of reads aligned to the cDNA model (irrespective of ecotype) per 1 kb of sequence per 10 million aligned reads. Because all organelles are derived from the female parent, we used the fraction of reads assigned to the female chloroplast genome as a measure of our method's accuracy. For all libraries, 99.3–99.6% of chloroplast reads were assigned to the female genome.

We calculated the probability that a gene's expression deviates from expectation using Fisher's two-tailed exact test. We used the same test to calculate the probability that a gene's imprinted status is altered by mutation of *MET1*, *FERTILIZATION INDEPENDENT ENDOSPERM* (*FIE*), or *DEMETER* (*DME*). The scores and *P* values for all genes are listed in [Dataset S2](#). To identify imprinted endosperm genes, we summed the scores from both of our library sets (pure and full). In addition to the *P* value cutoffs, a gene's maternal score had to be at least fourfold greater than the paternal score in both reciprocal crosses to be considered maternally expressed or a gene's paternal score had to be at least 1.5-fold greater than the maternal score in both reciprocal crosses to be considered paternally expressed. For a maternally expressed gene to be scored as biallelic in a mutant background, the gene's mutant maternal scores had to be less than fourfold greater than the paternal scores, the maternal/paternal ratio had to be at least twofold greater in WT, and the *P* value for the difference between mutant and WT had to be below 0.001.

**Validation of Gene Imprinting.** Primers were designed to amplify cDNA fragments that contain at least one SNP between Col-0 and *Ler* ([Dataset S3](#)). RNA from F1 endosperm was converted to double-stranded cDNAs by standard random-primed first-strand synthesis (Ambion) or by using the Ovation RNA-seq System (NuGen Technologies) according to the manufacturer's protocol. cDNA was sequenced by the Sanger method. Intensity of the *Ler* and Col sequence at the SNP was compared based on its Phred score or peak intensity. For genes that did not have a statistically significant number of reads in *met1* endosperm (Table 2), we carried out traditional Sanger sequence validation.

1. Xiao W, et al. (2003) Imprinting of the MEA Polycomb gene is controlled by antagonism between MET1 methyltransferase and DME glycosylase. *Dev Cell* 5:891–901.  
2. Ohad N, et al. (1999) Mutations in *FIE*, a WD polycomb group gene, allow endosperm development without fertilization. *Plant Cell* 11:407–416.

3. Choi Y, et al. (2002) DEMETER, a DNA glycosylase domain protein, is required for endosperm gene imprinting and seed viability in *arabidopsis*. *Cell* 110:33–42.  
4. Kinoshita T, Yadegari R, Harada JJ, Goldberg RB, Fischer RL (1999) Imprinting of the *MEDEA* polycomb gene in the *Arabidopsis* endosperm. *Plant Cell* 11:1945–1952.

- Gehring M, et al. (2006) DEMETER DNA glycosylase establishes MEDEA polycomb gene self-imprinting by allele-specific demethylation. *Cell* 124:495–506.
- Hsieh T-F, et al. (2009) Genome-wide demethylation of *Arabidopsis* endosperm. *Science* 324:1451–1454.
- Kerk NM, Ceserani T, Tausta SL, Sussex IM, Nelson TM (2003) Laser capture microdissection of cells from plant tissues. *Plant Physiol* 132:27–35.
- Li H, Ruan J, Durbin R (2008) Mapping short DNA sequencing reads and calling variants using mapping quality scores. *Genome Res* 18:1851–1858.
- Langmead B, Trapnell C, Pop M, Salzberg SL (2009) Ultrafast and memory-efficient alignment of short DNA sequences to the human genome. *Genome Biol*, 10.1186/gb-2009-10-3-r25.

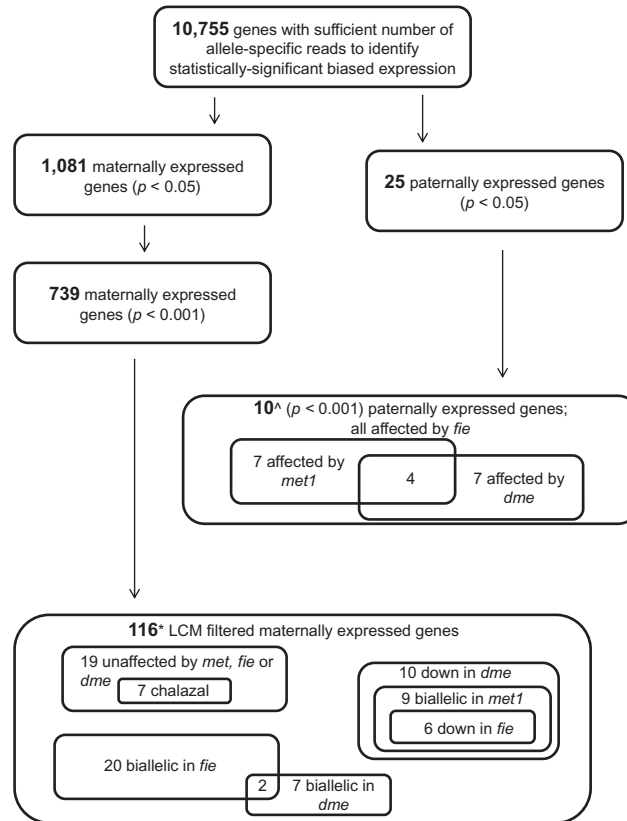

**Fig. S1.** Flowchart diagram of imprinted gene identification. The terminal diagrams for male- and female-expressed genes are modified Venn diagrams in which numbers within a box indicate the entire contents of the box to maintain consistency with values stated in the manuscript. For example, there are 20 maternally expressed genes with biallelic expression in *fie* and 7 with biallelic expression in *dme*; the two sets have two genes in common. ^Includes *SUVH7* identified by Sanger sequencing. \*Includes genes that were close to the LCM cutoff, but were affected by *met1*, *fie*, or *dme*, and *SUVH8* and *JMJ15* identified by Sanger sequencing.





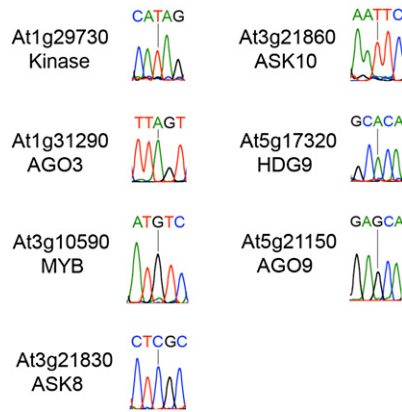

**Fig. S4.** Expression of genes in LCM endosperm tissue. Female Col-*g* was crossed with male Ler, and F1 endosperm was obtained through laser capture microdissection (LCM). RNA was isolated and used to generate RT-PCR sequencing chromatographs at selected SNP regions measuring allele-specific expression.

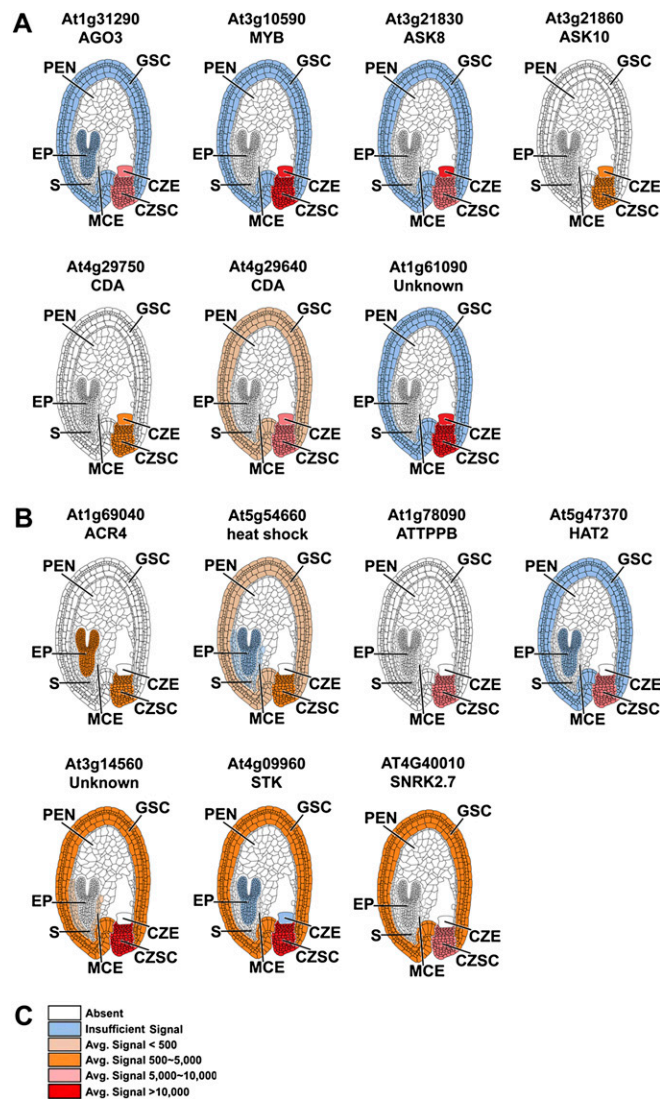

**Fig. S5.** Seed compartment-specific expression patterns from publicly available LCM microarray data (<http://seedgenenetwork.net/arabidopsis>). (A) Seven genes maternally expressed in the chalazal seed coat (CZSC) and chalazal endosperm (CZE). (B) Seven genes expressed in the chalazal endosperm (CZE). (C) Color-coded bars represent relative hybridization signals shown in A and B. Additional abbreviations for seed compartments: EP, embryo proper; GSC, general seed coat; MCE, micropylar endosperm; PEN, peripheral endosperm; S, suspensor. Abbreviations for gene names: CDA, cytidine deaminase; AGO3, ARGONAUTE 3; ASK, *Arabidopsis skip1-like*; ACT, *act repeat 4 amino acid binding*; ATTPPB, *A. thaliana trehalose-6-phosphate phosphatase*; HAT2, *homeodomain A. thaliana transcription factor*; STK, *seed stick transcription factor*; SNRK2.7, *SNF1-related protein kinase 2.7*.

**Table S1. Previously described imprinted genes**

| Number            | Annotation | CxL M/P | LxC M/P | <i>met1</i> M/P | <i>fie</i> M/P | <i>dme</i> M/P | Endo exp* | Emb exp* | <i>met1</i> exp | <i>fie</i> exp | <i>dme</i> exp |
|-------------------|------------|---------|---------|-----------------|----------------|----------------|-----------|----------|-----------------|----------------|----------------|
| AT1G02580         | MEA        | NA      | NA      | NA              | NA             | NA             | 15/0      | 1/0      | 6               | 169            | 544            |
| AT1G65330         | PHE1       | NA      | NA      | NA              | NA             | NA             | 0/0       | 0/0      | 0               | 9,737          | 4,795          |
| AT2G32370 #/F/D/M | HDG3       | 43/126  | 42/216  | 2/1             | 527/595        | 208/123        | 108/256   | 8/0      | 3               | 1,798          | 304            |
| AT2G35670 \$      | FIS2       | 9/0     | 4/0     | 0/0             | 21/2           | 3/0            | 9/13      | 1/1      | 3               | 65             | 3              |
| AT3G03260         | HDG8       | 17/0    | 4/2     | 0/0             | 757/618        | 583/177        | 2/5       | 0/0      | 0               | 547            | 243            |
| AT3G19350         | MPC        | 0/0     | 0/0     | 0/0             | 2/0            | 2/0            | 0/0       | 0/0      | 0               | 11             | 13             |
| AT4G00540 #/m/d   | MYB3R2     | 100/0   | 75/2    | 2/7             | 118/20         | 36/2           | 18/28     | 0/1      | 8               | 44             | 7              |
| AT4G25530         | FWA/HDG6   | 3/0     | 2/0     | 1/3             | 333/1          | 3/0            | 6/8       | 1/3      | 5               | 657            | 6              |
| AT5G17320 #       | HDG9       | 45/2    | 208/7   | 2/0             | 409/15         | 59/4           | 75/203    | 13/1     | 10              | 314            | 44             |
| AT5G54650         | FH5        | 340/53  | 186/160 | 37/20           | 547/210        | 885/140        | 45/8      | 29/11    | 29              | 171            | 164            |
| AT5G62110         |            | 2/5     | 1/2     | 0/0             | 295/166        | 184/99         | 1/3       | 0/0      | 0               | 185            | 91             |

Total maternal (M) and paternal (P) reads are shown for the indicated genotypes, as well as transcriptional scores (number of reads per kb of sequence per 10 million aligned reads) for endosperm (Endo exp), embryo (Emb exp), and the indicated mutant genotypes.

\*Transcriptional scores derived from manually-dissected and LCM tissue are shown before and after the slash (/), respectively. # = scored as imprinted with  $p < 0.001$ ; \$ = scored as imprinted with  $p < 0.05$ ; F = biallelic in *fie* endosperm; D = biallelic in *dme* endosperm; M = downregulated in *met1* endosperm; m = biallelic in *met1* endosperm; d = downregulated in *dme* endosperm; NA = no SNPs between Col and Ler.

**Table S2. Maternally expressed genes that are biallelic in *fie* endosperm**

| Number      | Annotation        | CxL M/P   | LxC M/P   | <i>met1</i> M/P | <i>fie</i> M/P | <i>dme</i> M/P | Endo exp* | Emb exp*    | <i>met1</i> exp | <i>fie</i> exp | <i>dme</i> exp |
|-------------|-------------------|-----------|-----------|-----------------|----------------|----------------|-----------|-------------|-----------------|----------------|----------------|
| AT1G08050   | Zinc finger       | 24/1      | 42/4      | 1/0             | 35/34          | 25/4           | 81/36     | 11/8        | 66              | 476            | 136            |
| AT1G21790   |                   | 66/3      | 57/6      | 25/3            | 144/38         | 222/16         | 500/94    | 148/60      | 640             | 2,282          | 1,753          |
| AT1G69900 D |                   | 61/4      | 64/10     | 5/6             | 1,501/567      | 767/322        | 75/54     | 19/0        | 38              | 3,897          | 1,380          |
| AT1G76250   |                   | 140/3     | 36/1      | 11/0            | 36/31          | 168/6          | 44/29     | 2/0         | 70              | 90             | 139            |
| AT1G76820   | GTP binding       | 45/4      | 50/12     | 3/0             | 72/38          | 155/15         | 71/19     | 15/1        | 18              | 300            | 337            |
| AT1G77000   | SKP2B             | 279/64    | 264/60    | 69/6            | 1,602/874      | 728/201        | 150/119   | 24/4        | 166             | 1,926          | 605            |
| AT2G17990   |                   | 311/32    | 185/45    | 41/6            | 584/261        | 456/57         | 430/263   | 315/345     | 240             | 2,751          | 1,185          |
| AT2G31360   | ADS2              | 369/5     | 174/28    | 180/13          | 243/107        | 570/41         | 2,448/507 | 1,134/1,056 | 6,124           | 6,208          | 5,705          |
| AT3G17250   | PP2C-related      | 33/8      | 64/8      | 9/0             | 147/76         | 90/11          | 220/255   | 150/45      | 156             | 1,073          | 311            |
| AT3G22810   | PI binding        | 263/48    | 328/32    | 40/10           | 162/185        | 116/20         | 138/100   | 38/35       | 85              | 208            | 50             |
| AT4G01840   | TPK5              | 96/3      | 68/5      | 15/1            | 74/40          | 77/1           | 30/12     | 34/26       | 22              | 46             | 31             |
| AT4G16760   | ACX1              | 898/92    | 645/86    | 235/9           | 1,641/654      | 4,928/678      | 76/38     | 104/107     | 81              | 396            | 761            |
| AT5G02630   |                   | 31/0      | 26/0      | 5/0             | 91/26          | 100/21         | 6/0       | 1/0         | 9               | 51             | 38             |
| AT5G03370   | Acylphosphatase   | 168/13    | 83/16     | 13/1            | 130/46         | 119/23         | 42/21     | 45/74       | 15              | 103            | 59             |
| AT5G22920   | Zinc finger       | 64/7      | 55/10     | 2/0             | 57/31          | 51/7           | 62/48     | 81/10       | 17              | 144            | 87             |
| AT5G24460   |                   | 342/79    | 278/43    | 41/8            | 804/307        | 1,087/192      | 194/181   | 268/150     | 169             | 770            | 708            |
| AT5G42235   |                   | 2,226/160 | 4,438/949 | 798/13          | 4,325/1,649    | 6,478/457      | 1,907/457 | 147/2       | 1,544           | 5,202          | 4,732          |
| AT5G47770 D | FPS1              | 45/6      | 111/15    | 18/1            | 382/155        | 202/70         | 66/60     | 47/66       | 59              | 754            | 298            |
| AT5G53250   | AGP22             | 58/2      | 28/0      | 4/0             | 21/53          | 70/11          | 24/6      | 0/0         | 12              | 91             | 63             |
| AT5G53870   | Plastocyanin-like | 241/21    | 222/13    | 50/44           | 3,781/2,611    | 4,519/30       | 38/9      | 7/0         | 43              | 1,154          | 1,004          |

A list of maternally expressed imprinted genes that are biallelically expressed in *fie* endosperm. Total maternal (M) and paternal (P) reads are shown for the indicated genotypes, as well as transcriptional scores (number of reads per kb of sequence per 10 million aligned reads) for endosperm (Endo exp), embryo (Emb exp), and the indicated mutant genotypes.

\*Transcriptional scores derived from manually-dissected and LCM tissue are shown before and after the slash (/), respectively. D = biallelic in *dme* endosperm; ADS = ARABIDOPSIS DESATURASE; PP2C = PROTEIN PHOSPHATASE 2C; PI = phosphoinositide; TPK5 = tandem-pore K+ channel; ACX1 = ACYL-COA OXIDASE 1; FPS1 = FARNESYL DIPHOSPHATE SYNTHASE 1; AGP22 = ARABINO GALACTAN PROTEIN 22.

**Dataset S1. SNPs that distinguish Ler and Col-0**[Dataset S1](#)

## Dataset S2. Statistical assignments and maternal, paternal, and transcription scores for all genes

### [Dataset S2](#)

end\_M\_P < 0.05 = maternally expressed endosperm imprinted genes,  $P < 0.05$ ; end\_M\_P < 0.001 = maternally expressed endosperm imprinted genes,  $P < 0.001$ ; end\_M\_P < 0.001\_LCM-filtered = maternally expressed endosperm imprinted genes,  $P < 0.001$ , filtered by endosperm LCM expression data (details in the text); end\_M\_met1 = maternally expressed endosperm genes, the imprinting of which is significantly affected by a paternal met1 mutation; end\_M\_fie = maternally expressed endosperm genes, the imprinting of which is significantly affected by a maternal fie mutation; end\_M\_dme = maternally expressed endosperm genes, the imprinting of which is significantly affected by a maternal dme mutation; end\_M\_no\_mutant = maternally expressed endosperm genes, the imprinting of which is not significantly affected by met1, fie, or dme; chalazal = gene expressed only in chalazal endosperm and seed coat (details in the text); end\_P\_P < 0.05 = paternally expressed endosperm imprinted genes,  $P < 0.05$ ; end\_P\_P < 0.001 = paternally expressed endosperm imprinted genes,  $P < 0.001$ ; emb\_M\_P < 0.001 = maternally expressed embryo imprinted genes,  $P < 0.001$  (details in the text); emb\_P\_P < 0.001 = paternally expressed embryo imprinted genes,  $P < 0.001$  (details in the text); CxL\_p\_M = Col  $\times$  Ler pure endosperm (*Methods*) maternal score; CxL\_p\_P = Col  $\times$  Ler pure endosperm paternal score; LxC\_p\_P = Ler  $\times$  Col pure endosperm paternal score; LxC\_p\_M = Ler  $\times$  Col pure endosperm maternal score; M/P = Log 2 of the maternal score divided by the paternal score; Fisher::twotailed = Fisher's two-tailed  $P$  value (*Methods*); CxL\_f = Col  $\times$  Ler full endosperm (*Methods*); CxL\_a = sum of Col  $\times$  Ler pure and full endosperm scores (used for analysis presented in the text); dme\_M = dme endosperm maternal score; dme\_P = dme endosperm paternal score; fie\_M = fie endosperm maternal score; fie\_P = fie endosperm paternal score; met1\_M = met1 endosperm maternal score; met1\_P = met1 endosperm paternal score; CxL\_p\_n = Col  $\times$  Ler pure endosperm expression score (number of reads per kilobase of sequence per 10 million aligned reads); LxC\_p\_n = Ler  $\times$  Col pure endosperm expression score; end\_P = pure endosperm average expression score; CxL\_f\_n = Col  $\times$  Ler full endosperm expression score; LxC\_f\_n = Ler  $\times$  Col full endosperm expression score; end\_f = full endosperm average expression score; end\_a = average of end\_p and end\_f scores (reported in the text); LCM\_end\_n = LCM endosperm expression score; dme\_n = dme endosperm expression score; fie\_n = fie endosperm expression score; met1\_n = met1 endosperm expression score; CxL\_emb\_M = Col  $\times$  Ler embryo maternal score; CxL\_emb\_P = Col  $\times$  Ler embryo paternal score; LxC\_emb\_P = Ler  $\times$  Col embryo paternal score; LxC\_emb\_M = Ler  $\times$  Col embryo maternal score; CxL\_emb\_n = Col  $\times$  Ler embryo expression score; LxC\_emb\_n = Ler  $\times$  Col embryo expression score; emb\_a = average embryo expression score (reported in the text); LCM\_emb\_n = LCM embryo expression score.

## Dataset S3. Validated SNPs that distinguish Let and Col-0

### [Dataset S3](#)
